# Supplementary figures and images for: Fluorescence enhancement of a fluorescein derivative upon adsorption on cellulose
Source: Royal Society of Chemistry journal article supplement (doi:10.1039/c4pp00150h), 2014-06-26

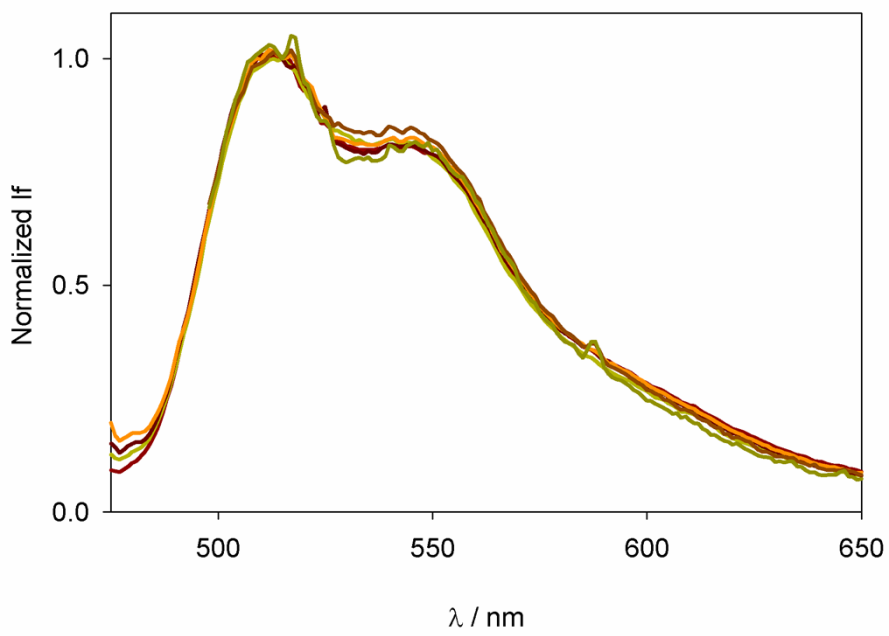

The spectra from Figure 7 were normalized at 515 nm.

Supplement: c4pp00150h1.pdf [file c4pp00150h1.pdf]
